# Supplementary material for: Influence of the stacking sequence on layered-chalcogenide properties: first principles investigation of Pb2Bi2Te5
Source: Royal Society of Chemistry journal article supplement (doi:10.1039/d1cp00270h), 2021-01-01
Supplement: d1cp00270h1.pdf [file d1cp00270h1.pdf]

## Influence of the stacking sequence on layered-chalcogenides properties: First principle investigation of $\text{Pb}_2\text{Bi}_2\text{Te}_5$

Weiliang MA,<sup>ab</sup> Marie-Christine RECORD,<sup>\*a</sup> Jing TIAN,<sup>ab</sup> and Pascal BOULET<sup>b</sup>

<sup>a</sup> Aix-Marseille University, University of Toulon, CNRS, IM2NP, Marseille, France. E-mail: weiliang.ma@etu.univ-amu.fr,

\* Corresponding author: m-c.record@univ-amu.fr

<sup>b</sup> Aix-Marseille University, CNRS, MADIREL, Marseille, France. E-mail: jing.tian@etu.univ-amu.fr; pascal.boulet@univ-amu.fr

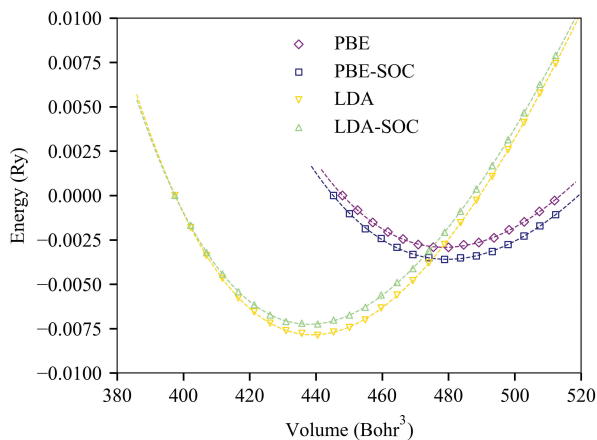

Figure S1 Relative energy versus cell volume for PbTe.

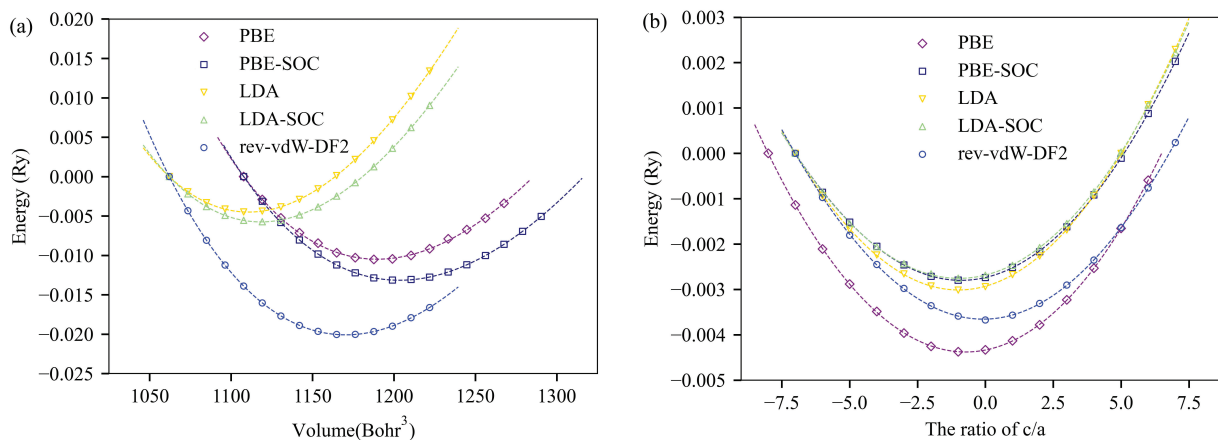

Figure S2 Relative energy versus cell volume (a) and a/c ratio (b) for  $\text{Bi}_2\text{Te}_3$ .

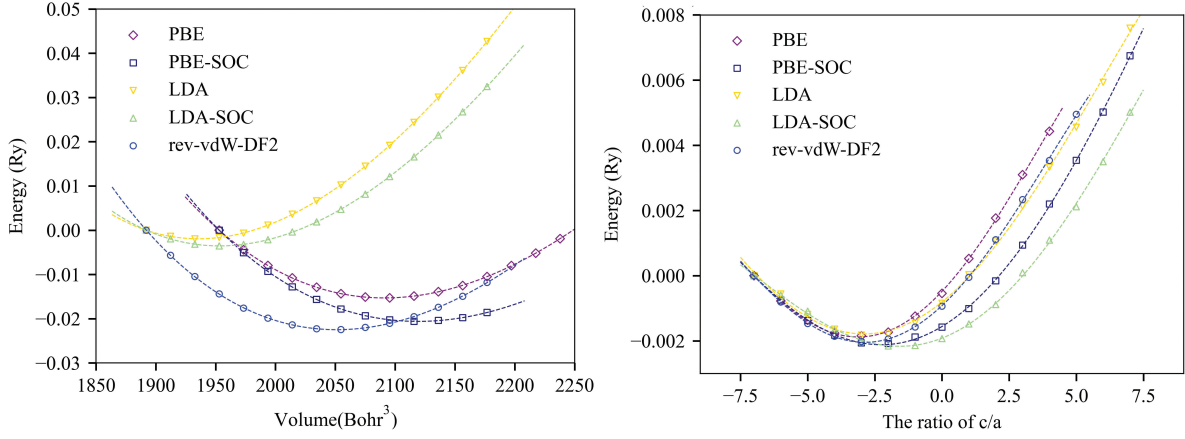

**Figure S3** Relative energy versus cell volume (a) and a/c ratio (b) for  $\text{Pb}_2\text{Bi}_2\text{Te}_5$  with stacking A.

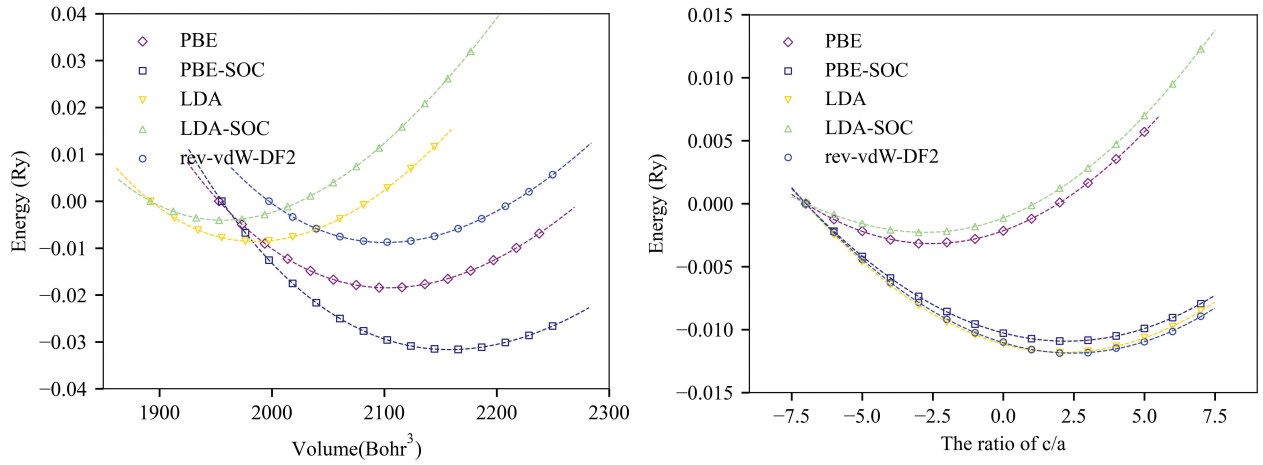

**Figure S4** Relative energy versus cell volume (a) and a/c ratio (b) for  $\text{Pb}_2\text{Bi}_2\text{Te}_5$  with stacking B.

**Table S1** Topological properties of  $\text{PbTe}$  and  $\text{Bi}_2\text{Te}_3$  corresponding to the BCPs in Figure S8a,b;  $r_1$  is the distance between BCP and Bi;  $r_2$  is the distance between BCP and Te;  $r_1$  and  $r_2$  are in unit of pm; the angle is between BCPs and their two ends;  $\rho$  and  $\nabla^2\rho$  are the electron charge density and its Laplacian at the BCPs in unit of  $10^{-2}e/\text{bohr}^3$  and  $10^{-2}e/\text{bohr}^5$ ;  $G$ ,  $V$  and  $H$  represent the kinetic, potential and total energy densities at the BCPs in unit of  $10^{-2}a.u./\text{bohr}^3$ .

| BCP                                | $r_1$ | $r_2$ | $r_1/r_2$ | angle  | $\rho$ | $\nabla^2\rho$ | $G$  | $V$   | $H$   | $ V /G$ | $H/\rho$ |
|------------------------------------|-------|-------|-----------|--------|--------|----------------|------|-------|-------|---------|----------|
| $\text{PbTe-b}$                    | 158.2 | 170.4 | 0.9286    | 180.00 | 2.672  | 3.111          | 1.20 | -1.63 | -0.43 | 1.35    | -1.60    |
| $\text{Bi}_2\text{Te}_3\text{-b1}$ | 157.5 | 165.3 | 0.9526    | 179.84 | 3.095  | 3.168          | 1.40 | -2.02 | -0.61 | 1.44    | -1.98    |
| $\text{Bi}_2\text{Te}_3\text{-b2}$ | 149.2 | 156.7 | 0.9526    | 179.64 | 4.267  | 2.710          | 1.95 | -3.22 | -1.27 | 1.65    | -2.98    |
| $\text{Bi}_2\text{Te}_3\text{-b3}$ | 178.0 | 178.0 | 1.0000    | 180.00 | 1.379  | 2.075          | 0.75 | -0.88 | -0.13 | 1.18    | -0.75    |

**Table S2** Electron charge density ( $10^2\rho$  in  $e/\text{bohr}^3$ ) at the bond critical points along the slab for stacking-A-sequence structures with 9 (S1-1) and 21 (S1-2) layers, for stacking-B-sequence structures with 9 (S2-1) and 21 (S2-2) layers and stacking-B-sequence structures with the Bi atom replaced by a Pb one with 9 (S3-1) and 21 (S3-2) layers. The critical point numbered 1 corresponds to the Te-Te bond across the gap between the slabs.

|      | 1    | 2    | 3    | 4    | 5    | 6    | 7    | 8    | 9    | 10   | 11   |
|------|------|------|------|------|------|------|------|------|------|------|------|
| S1-1 | 1.77 | 4.15 | 1.99 | 4.02 | 3.06 |      |      |      |      |      |      |
| S2-1 | 1.38 | 4.08 | 2.83 | 2.90 | 2.86 |      |      |      |      |      |      |
| S3-1 | 1.69 | 3.60 | 2.26 | 2.98 | 2.67 |      |      |      |      |      |      |
| S1-2 | 1.41 | 4.06 | 1.71 | 3.93 | 2.93 | 3.04 | 3.57 | 2.54 | 3.58 | 2.75 | 3.20 |
| S2-2 | 1.04 | 3.94 | 2.69 | 2.75 | 2.70 | 2.74 | 2.73 | 2.74 | 2.73 | 2.74 | 2.74 |
| S3-2 | 1.70 | 3.62 | 2.19 | 3.02 | 2.49 | 2.87 | 2.61 | 2.79 | 2.67 | 2.75 | 2.71 |

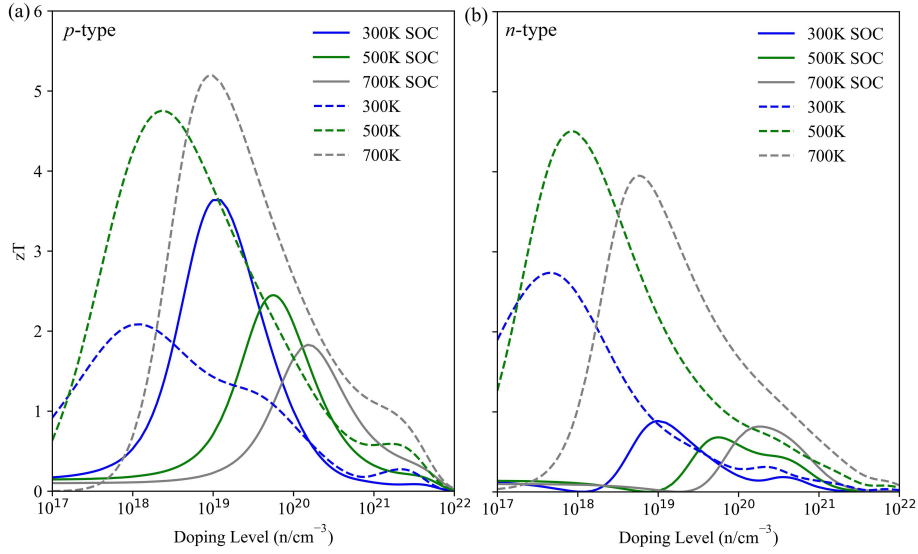

**Figure S5** Calculated figure of merit  $zT$  of Pb<sub>2</sub>Bi<sub>2</sub>Te<sub>5</sub> stacking A with  $p$ -type (a) and  $n$ -type (b). The solid and dash lines represent  $zT$  with and without SOC.

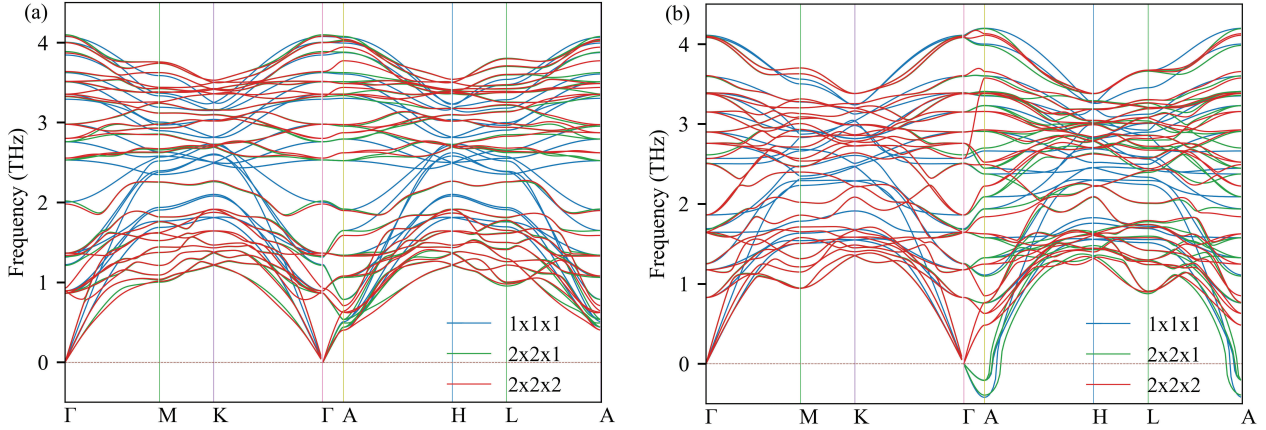

**Figure S6** Phonon dispersion convergence of Pb<sub>2</sub>Bi<sub>2</sub>Te<sub>5</sub> stacking A (a) and stacking B (b) with  $1 \times 1 \times 1$ ,  $2 \times 2 \times 1$  and  $2 \times 2 \times 2$  supercell.

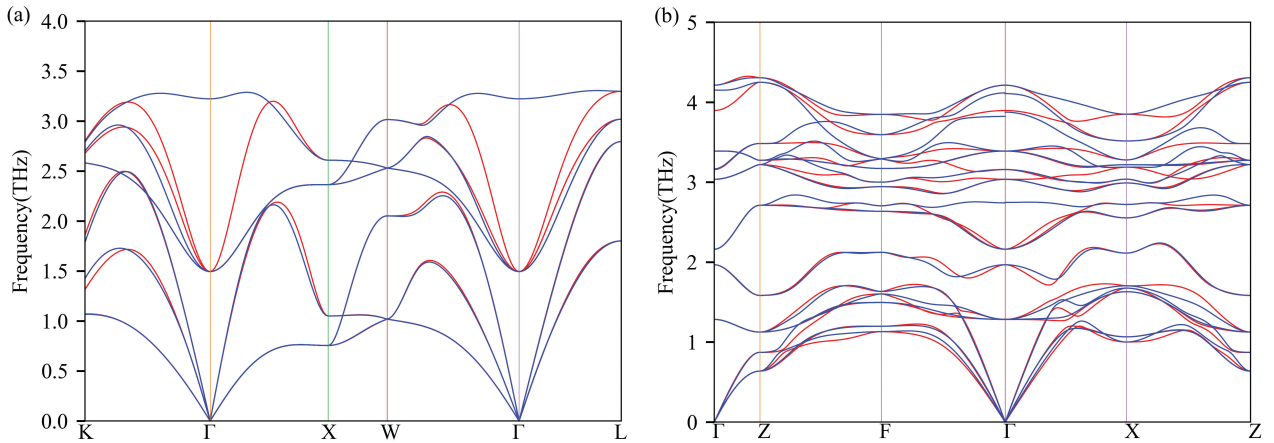

**Figure S7** Phonon dispersion of PbTe (a) and Bi<sub>2</sub>Te<sub>3</sub> (b) with (blue line) and without (red line) LO-TO splitting effect. Long-range electrostatic interactions are included by evaluating the dielectric tensor and Born effective charges using density functional perturbation theory.

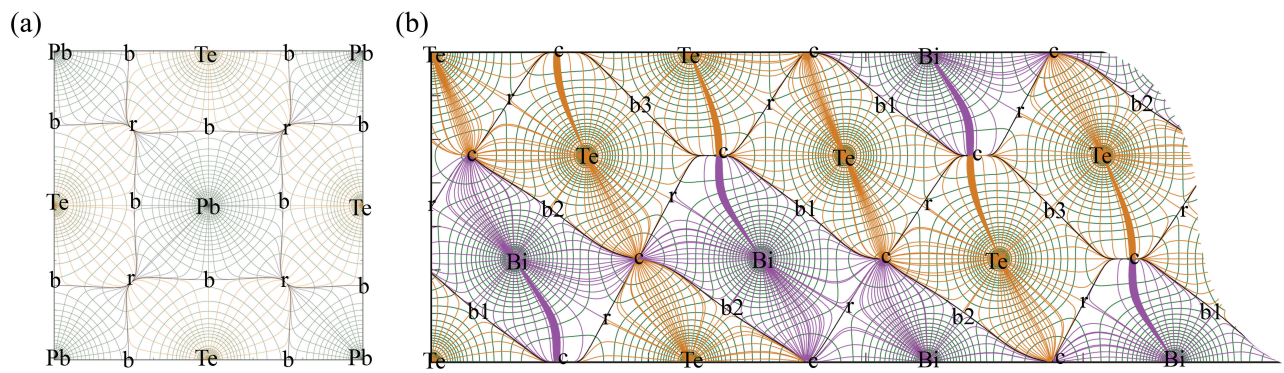

**Figure S8** CPs and flux lines derived from  $\nabla\rho(r)$  (light green lines) of PbTe (a) in (100)-plane and Bi<sub>2</sub>Te<sub>3</sub> (b) in (110)-plane.
